# Supplementary material for: An analysis of the 24-hour on-call experience and treatment decision of a dental resident, a retrospective study
Source: PeerJ. 2025 Jan 30;13:e18678. doi: 10.7717/peerj.18678 (PMC11787798; doi:10.7717/peerj.18678)
Supplement: Supplemental Information 1 — Each data point indicates a consult with the date and time, patient age and gender, diagnosis, and any emergent interventions. [file peerj-13-18678-s001.xlsx]

## Sheet: Sheet1
ID	Sex	Age	normal or extending time（预期有差异）	dental Interventions（因变量）	Major（预期有差异）	Level（预期有差异）
1	2	52	2	2	5	PG4
2	2	34	1	1	5	PG4
3	2	29	2	1	5	PG6
4	1	4	2	1	5	PG6
5	1	25	2	1	5	PG6
6	2	32	2	1	5	PG6
7	2	81	1	1	5	PG6
8	1	16	2	1	5	PG6
9	1	26	2	1	1	PG5
10	2	51	2	1	1	PG5
11	1	10	1	1	1	PG5
12	1	49	1	1	1	PG5
13	2	26	2	1	3	PG5
14	2	25	2	1	3	PG5
15	1	43	2	1	3	PG5
16	1	7	2	1	3	PG4
17	1	34	2	1	1	PG5
18	1	23	2	1	1	PG5
19	2	28	2	1	1	PG5
20	1	34	1	1	1	PG5
21	1	30	2	1	1	PG6
22	2	17	2	1	1	PG6
23	1	36	2	2	1	PG6
24	2	19	2	1	1	PG6
25	2	19	2	1	1	PG6
26	2	23	1	1	1	PG6
27	2	24	2	2	7	PG6
28	2	19	2	2	7	PG6
29	1	27	2	2	7	PG6
30	2	13	2	2	7	PG6
31	2	5	1	2	7	PG6
32	2	14	1	2	7	PG6
33	1	37	2	1	1	PG4
34	1	28	2	1	1	PG4
35	2	46	2	1	1	PG4
36	1	6	2	1	1	PG4
37	1	22	2	2	5	PG4
38	1	24	2	1	5	PG4
39	2	25	2	1	5	PG4
40	2	8	2	1	5	PG4
41	1	57	2	1	5	PG4
42	2	27	2	1	5	PG4
43	2	7	1	1	5	PG4
44	1	11	1	1	5	PG4
45	1	50	1	1	5	PG4
46	1	7	1	1	5	PG4
47	2	6	1	1	5	PG4
48	1	36	2	1	1	PG6
49	2	26	2	2	1	PG6
50	2	28	2	1	1	PG6
51	2	75	1	1	1	PG6
52	1	47	2	2	4	PG4
53	2	26	2	2	4	PG4
54	1	28	2	2	4	PG4
55	1	31	2	1	4	PG4
56	1	45	1	1	4	PG4
57	2	28	1	2	4	PG4
58	2	28	1	2	4	PG4
59	2	28	2	2	6	PG5
60	1	11	2	1	6	PG5
61	2	11	2	2	6	PG5
62	1	6	1	2	6	PG5
63	2	29	1	2	6	PG5
64	2	25	2	1	5	PG4
65	2	4	2	2	5	PG4
66	1	12	1	1	5	PG4
67	1	24	1	1	5	PG4
68	2	21	1	1	5	PG4
69	1	48	2	2	2	PG6
70	1	32	2	2	2	PG6
71	2	27	2	1	1	PG5
72	2	31	2	1	1	PG5
73	1	29	1	1	1	PG5
74	1	6	1	1	1	PG5
75	2	7	1	1	1	PG5
76	2	14	1	1	1	PG5
77	2	36	2	2	4	PG5
78	2	47	1	2	4	PG5
79	1	46	2	1	4	PG5
80	1	31	2	2	4	PG5
81	2	21	1	1	4	PG5
82	2	30	2	2	4	PG6
83	2	19	2	2	4	PG6
84	2	64	1	1	3	PG6
85	1	69	1	1	3	PG6
86	2	27	2	2	4	PG4
87	1	34	2	1	4	PG4
88	1	25	2	2	4	PG4
89	1	46	1	2	4	PG4
90	1	24	1	2	4	PG4
91	2	25	2	1	6	PG4
92	1	31	2	1	6	PG4
93	2	19	1	1	6	PG4
94	1	46	1	1	6	PG4
95	2	35	2	2	6	PG4
96	2	8	1	1	6	PG4
97	2	65	2	2	1	PG5
98	2	25	2	1	1	PG5
99	1	15	2	1	1	PG5
100	1	26	2	1	1	PG5
101	1	37	2	2	7	PG4
102	1	16	2	2	7	PG4
103	2	17	2	1	7	PG4
104	1	17	2	2	7	PG4
105	2	47	1	2	7	PG4
106	1	7	1	1	7	PG4
107	2	6	1	2	7	PG4
108	2	16	1	1	7	PG4
109	1	7	1	2	7	PG4
110	1	6	1	1	7	PG4
111	1	27	2	2	7	PG4
112	1	30	2	1	7	PG4
113	2	24	2	2	7	PG4
114	1	22	2	1	7	PG4
115	2	29	2	1	7	PG4
116	1	25	2	1	5	PG5
117	2	31	2	1	5	PG5
118	2	33	2	1	5	PG5
119	2	66	2	1	5	PG5
120	2	28	2	2	2	PG6
121	2	16	2	2	2	PG6
122	1	4	2	2	2	PG6
123	1	44	1	1	2	PG6
124	1	54	2	1	4	PG4
125	2	27	2	2	4	PG4
126	1	25	2	1	5	PG6
127	1	34	2	1	5	PG6
128	1	30	2	1	5	PG6
129	1	43	2	1	5	PG6
130	2	57	1	1	5	PG6
131	2	47	2	1	2	PG5
132	1	4	2	2	2	PG5
133	2	43	2	2	2	PG5
134	2	43	2	2	1	PG4
135	1	32	2	1	1	PG4
136	1	38	2	1	1	PG4
137	1	19	1	1	1	PG4
138	1	27	2	1	1	PG4
139	1	23	2	1	1	PG4
140	1	62	1	1	1	PG4
141	1	49	1	1	1	PG4
142	2	57	2	2	1	PG5
143	1	29	2	2	4	PG4
144	2	26	2	2	4	PG4
145	1	16	2	1	1	PG4
146	1	58	2	1	1	PG4
147	1	44	2	1	1	PG4
148	1	35	2	1	1	PG4
149	2	67	1	1	1	PG4
150	1	22	2	1	1	PG5
151	1	4	2	1	1	PG5
152	2	67	2	1	1	PG5
153	1	14	1	1	1	PG5
154	1	40	1	2	1	PG5
155	1	7	2	1	3	PG5
156	1	25	1	1	3	PG5
157	1	26	2	1	2	PG4
158	1	62	2	1	2	PG4
159	1	41	2	1	2	PG4
160	1	36	2	1	2	PG4
161	2	52	2	1	2	PG4
162	1	41	2	1	1	PG4
163	2	34	2	1	1	PG4
164	1	34	1	1	1	PG4
165	1	4	2	1	7	PG5
166	2	66	1	2	7	PG5
167	2	9	2	2	7	PG6
168	1	78	1	1	7	PG6
169	2	16	1	2	7	PG6
170	2	60	2	2	7	PG6
171	2	40	2	2	7	PG6
172	1	67	1	2	7	PG6
173	2	30	2	1	3	PG4
174	2	20	1	1	3	PG4
175	1	14	2	2	4	PG6
176	1	31	2	2	4	PG5
177	1	16	1	2	4	PG5
178	1	41	2	2	4	PG5
179	1	42	1	2	4	PG5
180	2	27	1	2	4	PG5
181	2	24	1	2	4	PG5
182	1	23	1	1	4	PG5
183	2	31	2	1	6	PG6
184	2	38	2	1	6	PG6
185	2	40	2	1	6	PG6
186	2	27	2	1	6	PG6
187	1	22	1	1	6	PG6
188	2	27	1	2	6	PG6
189	2	35	1	1	6	PG6
190	1	40	2	2	6	PG6
191	1	31	2	2	6	PG6
192	1	28	2	1	6	PG6
193	1	32	2	2	6	PG6
194	2	24	2	2	6	PG6
195	2	15	2	1	6	PG6
196	2	81	2	2	6	PG6
197	2	24	1	1	6	PG6
198	2	36	2	1	5	PG5
199	2	6	1	1	5	PG5
200	1	44	1	1	5	PG5
201	2	36	1	2	5	PG5
202	1	11	1	2	3	PG4
203	1	10	1	2	3	PG4
204	2	53	1	1	3	PG4
205	2	33	1	2	3	PG4
206	1	77	2	1	7	PG5
207	1	46	2	2	4	PG6
208	1	29	1	2	4	PG6
209	2	36	1	2	4	PG6
210	1	43	1	1	4	PG6
211	2	23	2	1	3	PG5
212	1	37	2	1	3	PG4
213	1	59	1	1	3	PG5
214	1	29	2	1	1	PG5
215	2	14	2	1	1	PG5
216	2	36	2	1	1	PG5
217	1	28	1	1	1	PG5
218	2	49	1	2	1	PG5
219	2	29	1	1	1	PG5
220	2	17	1	1	1	PG5
221	1	38	1	1	1	PG5
222	2	36	1	1	1	PG5
223	1	28	1	1	1	PG5
224	1	13	1	1	1	PG5
225	1	22	1	1	1	PG5
226	1	16	1	2	1	PG5
227	1	7	2	2	6	PG5
228	1	25	2	2	6	PG5
229	1	54	2	2	6	PG5
230	2	11	2	2	6	PG5
231	2	24	2	1	6	PG5
232	1	23	2	2	7	PG5
233	2	60	2	2	7	PG5
234	2	57	2	2	7	PG5
235	1	30	2	1	5	PG4
236	2	3	2	1	5	PG4
237	1	23	2	1	5	PG4
238	1	45	2	2	7	PG6
239	2	8	2	1	1	PG4
240	2	61	2	2	1	PG4
241	2	51	2	1	1	PG5
242	2	25	2	1	5	PG4
243	2	24	2	1	5	PG4
244	2	13	2	1	5	PG4
245	2	31	1	1	5	PG4
246	2	34	2	2	4	PG5
247	1	29	2	2	4	PG5
248	1	40	2	1	1	PG5
249	1	27	2	2	1	PG5
250	1	33	2	1	1	PG5
251	2	35	2	1	1	PG5
252	1	28	2	1	1	PG5
253	2	72	1	1	1	PG5
254	2	28	1	1	1	PG5
255	1	11	1	2	1	PG5
256	1	60	2	1	1	PG6
257	1	8	2	2	1	PG6
258	2	15	2	1	1	PG6
259	2	36	1	1	1	PG6
260	2	30	1	1	1	PG6
261	1	28	1	2	1	PG6
262	2	32	1	1	1	PG6
263	2	7	1	2	1	PG6
264	1	36	1	2	1	PG6
265	1	29	2	2	2	PG6
266	1	27	2	1	7	PG5
267	1	50	2	1	7	PG5
268	2	21	2	1	7	PG5
269	2	57	2	2	7	PG5
270	2	54	2	2	7	PG5
271	2	27	2	2	2	PG5
272	1	29	2	1	6	PG5
273	1	30	2	1	6	PG5
274	2	39	2	1	6	PG5
275	2	33	1	2	6	PG5
276	1	45	2	2	1	PG5
277	1	26	2	1	6	PG6
278	1	27	2	2	6	PG6
279	2	5	2	2	6	PG6
280	2	34	2	1	5	PG6
281	1	31	2	2	5	PG6
282	2	22	2	1	5	PG6
283	2	24	2	1	5	PG6
284	1	44	1	1	2	PG5
285	1	29	1	1	1	PG4
286	1	6	2	2	1	PG4
287	2	37	2	2	2	PG4
288	2	16	2	2	2	PG4
289	2	62	2	1	2	PG4
290	2	19	2	1	2	PG4
291	2	60	1	2	2	PG4
292	2	45	1	1	2	PG4
293	2	26	1	1	2	PG4
294	2	70	2	1	4	PG4
295	1	10	1	1	4	PG4
296	2	53	1	2	4	PG4
297	1	10	1	2	4	PG4
298	1	50	1	2	4	PG4
299	1	36	1	2	4	PG4
300	2	36	1	2	4	PG4
301	2	25	2	1	1	PG4
302	1	26	2	1	1	PG4
303	1	11	1	1	1	PG4
304	1	6	1	1	1	PG4
305	2	59	1	2	1	PG4
306	2	53	1	1	1	PG4
307	2	4	1	2	1	PG4
308	1	33	2	1	1	PG4
309	2	41	2	1	1	PG4
310	2	30	2	2	4	PG6
311	2	31	2	2	4	PG6
312	1	32	2	2	4	PG6
313	2	25	2	1	7	PG5
314	2	35	2	1	7	PG6
315	1	33	2	1	7	PG5
316	2	33	2	2	7	PG5
317	1	44	1	1	3	PG5
318	2	13	1	1	3	PG5
319	2	15	1	1	3	PG5
320	2	11	1	1	3	PG5
321	2	10	1	1	3	PG5
322	2	21	1	1	3	PG5
323	2	31	1	1	3	PG5
324	2	29	2	1	3	PG4
325	1	25	2	2	4	PG5
326	1	11	2	2	4	PG5
327	2	59	2	1	1	PG6
328	1	26	2	2	6	PG6
329	1	29	2	1	6	PG6
330	1	28	2	2	6	PG6
331	2	28	2	1	6	PG6
332	1	25	2	1	5	PG5
333	1	68	1	1	6	PG5
334	2	53	1	1	4	PG4
335	2	18	1	1	4	PG4
336	1	37	2	1	7	PG4
337	2	8	1	1	7	PG4
338	2	29	1	1	4	PG6
339	1	52	2	2	4	PG6
340	2	15	1	1	4	PG6
341	1	10	1	2	4	PG6
342	2	59	2	1	5	PG4
343	1	45	2	1	5	PG4
344	2	16	2	1	5	PG4
345	1	18	1	1	5	PG4
346	1	21	1	1	5	PG4
347	2	27	1	2	5	PG4
348	2	64	2	1	1	PG4
349	2	22	1	1	1	PG4
350	1	46	2	1	4	PG4
351	1	7	2	1	4	PG4
352	1	10	2	2	4	PG4
353	2	28	2	1	2	PG5
354	1	22	2	1	2	PG5
355	2	29	2	2	2	PG5
356	2	22	2	1	1	PG5
357	1	16	2	2	1	PG5
358	1	26	2	1	1	PG5
359	1	60	2	2	1	PG5
360	2	11	2	1	1	PG5
361	1	39	1	1	1	PG5
362	1	30	2	2	6	PG5
363	2	42	1	2	6	PG5
364	1	48	2	1	6	PG5
365	2	4	2	2	6	PG5
366	2	53	1	1	6	PG5
367	1	41	2	1	3	PG4
368	1	18	1	1	3	PG5
369	1	37	2	2	7	PG6
370	2	27	2	1	3	PG5
371	1	14	1	1	3	PG6
372	2	34	1	1	3	PG6
373	1	39	2	1	1	PG5
374	1	25	2	2	1	PG5
375	1	29	2	1	1	PG5
376	2	12	2	1	1	PG5
377	2	25	1	1	1	PG5
378	2	38	2	1	5	PG4
379	1	20	2	1	5	PG4
380	1	63	1	1	5	PG4
381	2	54	1	1	5	PG4
382	2	64	2	2	4	PG5
383	1	5	1	1	4	PG5
384	1	36	1	1	4	PG5
385	1	35	2	2	4	PG5
386	2	27	1	1	4	PG5
387	2	50	1	1	4	PG5
388	2	25	1	2	4	PG5
389	1	35	2	2	2	PG6
390	1	25	2	2	2	PG6
391	1	24	2	2	2	PG6
392	1	27	2	2	2	PG6
393	2	35	2	2	2	PG6
394	2	20	2	2	2	PG6
395	1	29	2	2	2	PG6
396	2	40	2	2	6	PG6
397	2	21	2	1	1	PG6
398	2	55	2	1	1	PG6
399	1	36	2	2	5	PG6
400	1	60	2	1	5	PG6
401	1	34	2	1	5	PG6
402	2	29	1	1	6	PG6
403	1	20	1	1	6	PG6
404	2	55	2	1	2	PG5
405	1	23	2	1	2	PG4
406	1	37	2	1	2	PG4
407	2	62	2	2	2	PG4
408	2	25	2	1	2	PG4
409	1	31	1	2	2	PG4
410	1	23	1	1	2	PG4
411	2	27	1	1	2	PG4
412	2	36	1	1	2	PG4
413	2	41	1	2	6	PG6
414	1	30	2	1	7	PG5
415	1	7	2	1	7	PG5
416	2	69	2	1	7	PG5
417	1	31	2	1	4	PG4
418	1	58	2	2	4	PG4
419	1	51	2	1	4	PG4
420	1	10	2	1	4	PG4
421	1	60	1	1	4	PG4
422	1	3	1	2	4	PG4
423	1	15	1	2	4	PG4
424	2	10	2	1	1	PG6
425	2	5	2	1	1	PG6
426	2	37	2	2	7	PG6
427	1	44	2	1	3	PG4
428	1	34	1	2	3	PG4
429	2	11	1	1	3	PG4
430	1	9	2	1	3	PG4
431	2	25	2	2	3	PG6
432	1	35	2	1	3	PG5
433	1	22	2	1	4	PG4
434	1	24	2	1	4	PG4
435	1	26	2	1	4	PG4
436	1	18	1	2	4	PG4
437	1	9	1	1	4	PG4
438	1	34	2	1	5	PG5
439	2	5	2	1	5	PG5
440	2	11	1	2	5	PG5
441	2	7	2	2	6	PG6
442	1	7	1	2	6	PG6
443	2	29	1	2	6	PG6
444	2	13	1	1	6	PG6
445	2	24	1	2	6	PG6
446	1	17	1	1	6	PG6
447	2	32	2	2	6	PG5
448	2	30	2	2	6	PG5
449	2	11	2	2	6	PG5
450	1	9	2	2	1	PG5
451	1	5	2	1	5	PG5
452	2	33	2	2	4	PG6
453	2	36	2	2	4	PG6
454	1	7	2	2	4	PG6
455	2	8	2	2	4	PG6
456	1	16	1	1	4	PG6
457	1	27	1	2	3	PG4
458	2	30	1	1	3	PG4
459	2	31	1	1	3	PG4
460	1	54	2	2	7	PG4
461	2	31	2	2	4	PG6
462	2	17	1	1	4	PG6
463	2	6	2	1	3	PG4
464	1	30	2	1	3	PG4
465	2	28	2	1	1	PG5
466	2	27	2	1	1	PG5
467	2	30	2	1	1	PG5
468	2	28	2	1	4	PG4
469	1	37	2	2	4	PG4
470	2	34	2	1	4	PG4
471	2	34	2	2	1	PG5
472	1	40	2	1	6	PG5
473	1	43	2	2	6	PG5
474	1	28	1	1	6	PG5
475	2	63	2	2	6	PG5
476	2	8	2	1	4	PG5
477	2	15	1	2	4	PG5
478	2	44	1	1	4	PG5
479	2	29	2	2	7	PG6
480	2	33	2	2	7	PG6
481	2	54	2	2	7	PG6
482	2	26	1	1	1	PG4
483	1	41	1	1	1	PG4
484	2	36	1	1	1	PG4
485	2	13	1	1	1	PG4
486	2	32	1	1	1	PG4
487	2	18	2	1	5	PG4
488	2	23	2	1	5	PG4
489	1	41	2	1	5	PG4
490	1	48	2	1	5	PG4
491	2	5	2	1	5	PG4
492	1	29	2	1	5	PG4
493	2	26	2	1	5	PG4
494	2	30	1	1	5	PG4
495	2	7	1	1	5	PG4
496	1	44	2	2	4	PG4
497	1	35	2	2	4	PG4
498	1	36	2	1	4	PG4
499	2	4	2	2	4	PG4
500	2	15	2	2	4	PG4
501	1	25	2	1	1	PG5
502	2	52	2	1	1	PG5
503	2	28	2	1	1	PG5
504	2	46	1	1	1	PG5
505	2	34	1	1	1	PG5
506	2	41	2	1	1	PG5
507	1	26	2	1	1	PG5
508	2	26	2	1	2	PG6
509	1	44	1	1	2	PG6
510	2	34	2	2	6	PG5
511	1	50	2	2	6	PG5
512	1	26	2	2	6	PG5
513	2	49	2	1	6	PG5
514	2	26	2	1	6	PG5
515	2	20	1	1	6	PG5
516	2	7	1	1	6	PG5
517	2	37	1	2	6	PG5
518	2	42	1	1	6	PG5
519	1	61	1	1	6	PG5
520	1	60	2	1	5	PG5
521	2	58	2	1	5	PG5
522	1	36	2	1	5	PG5
523	2	48	2	1	5	PG5
524	2	24	2	2	6	PG6
525	1	39	2	2	6	PG6
526	2	19	1	2	6	PG6
527	1	24	1	1	6	PG6
528	1	23	2	1	4	PG4
529	1	28	2	2	4	PG4
530	2	32	2	1	4	PG4
531	1	66	1	1	4	PG4
532	1	31	2	1	5	PG6
533	2	25	2	1	5	PG6
534	1	44	2	1	5	PG6
535	1	59	2	1	2	PG4
536	1	64	2	2	2	PG4
537	2	32	2	2	2	PG4
538	1	52	2	1	2	PG4
539	1	52	2	1	2	PG4
540	1	30	1	1	2	PG4
541	2	6	1	2	2	PG4
542	1	12	1	2	1	PG4
543	1	25	2	1	1	PG4
544	2	31	2	1	1	PG4
545	1	12	2	2	2	PG5
546	1	63	2	1	2	PG4
547	1	5	2	1	2	PG4
548	2	32	2	2	7	PG6
549	1	39	2	2	7	PG6
550	1	6	2	2	3	PG4
551	2	19	1	1	3	PG4
552	2	8	2	1	3	PG6
553	2	67	1	2	3	PG5
554	2	30	1	1	3	PG5
555	1	21	1	1	3	PG5
556	2	16	1	2	3	PG5
557	1	58	1	1	3	PG5
558	2	12	1	1	3	PG5
559	1	18	1	1	3	PG5
560	1	49	2	2	3	PG5
561	2	24	2	2	3	PG5
562	2	33	2	2	3	PG6
563	1	5	2	2	3	PG6
564	1	32	2	1	4	PG5
565	2	22	2	2	4	PG5
566	2	35	2	2	4	PG5
567	1	65	2	2	4	PG5
568	1	14	1	2	4	PG5
569	2	26	2	2	1	PG6
570	2	36	2	1	1	PG6
571	1	56	2	1	1	PG6
572	1	14	2	1	1	PG6
573	1	49	2	1	1	PG6
574	2	48	2	2	6	PG6
575	1	8	2	1	6	PG6
576	1	4	2	2	6	PG6
577	1	35	2	2	7	PG5
578	1	32	2	1	7	PG5
579	1	3	2	2	7	PG5
580	2	59	2	2	7	PG5
581	1	9	2	2	7	PG5
582	1	20	2	1	5	PG5
583	2	38	2	1	5	PG5
584	2	6	2	1	5	PG5
585	2	62	2	1	5	PG5
586	1	13	2	1	5	PG5
587	1	65	2	2	5	PG5
588	2	6	1	1	5	PG5
589	1	8	2	1	5	PG5
590	2	33	1	1	5	PG5
591	1	11	1	1	5	PG5
592	1	30	1	1	5	PG5
593	2	5	1	1	5	PG5
594	2	59	1	2	5	PG5
595	2	11	2	2	6	PG6
596	1	28	2	1	4	PG6
597	2	33	2	2	4	PG6
598	2	35	2	2	4	PG6
599	2	10	2	1	1	PG6
600	1	33	1	1	1	PG6
601	2	33	1	1	1	PG6
602	2	57	1	2	1	PG6
603	1	61	1	2	1	PG6
604	2	60	1	1	1	PG6
605	1	33	2	1	5	PG4
606	2	29	2	1	5	PG4
607	1	25	2	2	5	PG4
608	1	40	2	2	5	PG4
609	2	33	2	1	5	PG4
610	2	7	2	2	5	PG4
611	1	11	1	1	5	PG4
612	2	4	1	1	5	PG4
613	1	30	2	2	1	PG5
614	2	31	2	2	1	PG5
615	1	24	2	2	4	PG4
616	1	25	2	1	2	PG5
617	1	19	2	1	2	PG5
618	2	47	2	1	5	PG6
619	2	41	2	1	6	PG5
620	1	29	2	1	6	PG5
621	2	16	2	1	6	PG5
622	2	80	2	1	6	PG5
623	1	50	2	2	6	PG5
624	2	23	2	1	6	PG5
625	2	25	2	1	6	PG5
626	2	60	2	2	3	PG5
627	2	28	2	2	3	PG6
628	1	12	2	2	3	PG6
629	2	38	2	2	7	PG6
630	2	10	1	1	7	PG6
631	2	25	2	1	1	PG4
632	1	34	1	1	1	PG4
633	2	24	2	1	5	PG4
634	1	29	2	1	4	PG5
635	2	52	2	2	4	PG5
636	2	8	1	1	4	PG5
637	2	34	1	2	4	PG5
638	2	8	1	1	4	PG5
639	2	6	1	2	4	PG5
640	2	39	2	2	2	PG6
641	2	29	2	2	2	PG6
642	1	32	2	1	1	PG5
643	2	28	2	1	1	PG5
644	2	23	2	2	1	PG5
645	1	24	2	1	1	PG5
646	2	29	2	1	1	PG5
647	2	57	2	1	1	PG5
648	2	20	2	2	1	PG6
649	1	28	2	2	1	PG6
650	1	21	2	2	4	PG5
651	1	4	2	2	4	PG5
652	2	26	2	2	4	PG5
653	1	36	2	2	6	PG5
654	2	45	2	1	6	PG5
655	2	29	2	2	6	PG5
656	1	38	2	2	5	PG5
657	1	35	2	2	5	PG5
658	2	32	2	1	5	PG5
659	2	23	2	1	5	PG5
660	2	6	1	1	5	PG5
661	2	73	1	2	6	PG6
662	2	24	2	2	6	PG6
663	1	25	2	2	4	PG4
664	2	34	2	2	4	PG4
665	1	13	1	1	4	PG4
666	2	44	1	2	4	PG4
667	1	28	1	2	4	PG4
668	1	28	1	1	4	PG4
669	1	16	2	2	5	PG6
670	2	23	2	2	5	PG6
671	2	23	2	1	5	PG6
672	1	28	2	1	5	PG6
673	1	28	2	1	2	PG4
674	2	36	2	1	2	PG4
675	1	32	2	2	2	PG4
676	2	30	1	1	2	PG4
677	2	59	1	1	2	PG4
678	2	57	1	2	2	PG4
679	2	45	1	1	2	PG4
680	2	20	2	1	1	PG4
681	2	24	2	1	1	PG4
682	1	5	2	2	7	PG5
683	1	36	2	2	7	PG5
684	1	34	2	2	7	PG5
685	1	25	2	2	7	PG5
686	1	40	1	1	7	PG5
687	1	28	1	1	7	PG5
688	2	53	1	2	7	PG5
689	1	21	1	1	6	PG5
690	2	24	1	1	6	PG5
691	2	66	2	1	7	PG5
692	2	25	2	2	7	PG5
693	2	53	2	2	7	PG6
694	1	15	2	1	7	PG6
695	1	33	1	2	7	PG6
696	1	88	2	2	3	PG6
697	2	68	2	2	3	PG5
698	1	53	1	2	4	PG4
699	2	45	1	1	3	PG4
700	2	24	2	2	3	PG5
701	1	70	1	2	3	PG5
702	2	26	2	2	4	PG4
703	2	29	2	1	4	PG4
704	2	65	1	2	4	PG4
705	2	6	1	2	4	PG4
706	1	6	1	1	4	PG4
707	2	22	1	2	4	PG4
708	2	26	2	1	1	PG6
709	2	35	2	2	1	PG6
710	1	27	2	2	6	PG6
711	2	3	2	2	6	PG6
712	1	23	2	2	6	PG6
713	1	6	1	2	6	PG6
714	2	36	2	2	6	PG6
715	2	24	2	2	6	PG6
716	2	29	2	1	6	PG6
717	1	23	2	2	6	PG6
718	1	42	1	2	6	PG6
719	2	47	1	1	6	PG6
720	1	51	2	1	7	PG5
721	1	39	2	1	5	PG5
722	2	19	1	2	5	PG5
723	1	33	1	1	5	PG5
724	2	38	2	1	1	PG5
725	2	36	2	1	1	PG5
726	1	45	1	2	1	PG5
727	1	57	1	2	1	PG5
728	1	32	1	1	1	PG5
729	2	54	2	1	1	PG5
730	1	63	1	2	1	PG5
731	2	37	1	1	1	PG5
732	2	45	1	1	1	PG5
733	2	51	1	1	1	PG5
734	2	45	1	1	1	PG5
735	2	24	2	2	4	PG6
736	2	30	2	2	4	PG6
737	2	20	1	2	4	PG6
738	2	32	2	2	3	PG4
739	1	74	1	2	3	PG4
740	1	26	1	2	3	PG4
741	1	29	2	2	7	PG5
742	1	38	1	2	7	PG6
743	2	28	2	1	7	PG4
744	1	78	1	1	7	PG4
745	2	52	2	2	7	PG4
746	1	52	1	1	7	PG4
747	1	31	2	2	1	PG5
748	1	41	2	1	1	PG5
749	1	16	1	1	1	PG5
750	1	68	1	1	1	PG5
751	1	69	1	1	1	PG5
752	1	29	1	1	3	PG5
753	1	35	2	2	3	PG5
754	1	53	2	2	3	PG5
755	1	33	1	1	3	PG5
756	2	14	1	1	3	PG5
757	2	17	2	2	3	PG5
758	1	38	1	1	3	PG5
759	2	14	1	1	3	PG5
760	2	26	2	2	3	PG6
761	1	9	1	1	3	PG5
762	1	72	1	2	3	PG5
763	2	28	2	2	4	PG4
764	1	58	2	2	4	PG4
765	1	23	1	2	4	PG4
766	2	34	1	2	4	PG4
767	1	33	2	1	2	PG5
768	1	16	2	1	1	PG5
769	2	60	2	1	1	PG5
770	2	44	2	2	1	PG5
771	1	71	2	1	1	PG5
772	1	43	1	2	1	PG5
773	1	36	1	1	1	PG5
774	1	52	1	1	1	PG5
775	2	38	1	1	1	PG5
776	1	24	2	2	4	PG6
777	1	10	2	2	4	PG6
778	2	32	1	1	4	PG6
779	2	43	1	1	4	PG6
780	2	18	2	2	5	PG4
781	1	38	2	1	5	PG4
782	2	59	2	1	5	PG4
783	1	55	2	1	5	PG4
784	2	10	1	1	5	PG4
785	1	47	1	1	5	PG4
786	2	8	1	1	5	PG4
787	2	26	1	1	5	PG4
788	2	46	2	1	1	PG6
789	1	34	2	1	1	PG6
790	1	29	2	1	1	PG6
791	2	20	1	1	1	PG6
792	2	13	1	1	1	PG6
793	2	18	1	2	1	PG6
794	2	30	1	1	1	PG6
795	2	25	1	2	1	PG6
796	2	12	1	1	1	PG6
797	1	17	1	1	1	PG6
798	1	27	1	1	1	PG6
799	2	15	1	1	1	PG6
800	2	6	1	2	1	PG6
801	2	31	1	1	1	PG6
802	2	24	2	1	1	PG4
803	1	44	1	2	1	PG4
804	2	53	1	2	1	PG4
805	1	52	1	1	1	PG4
806	1	39	2	1	5	PG4
807	2	34	2	2	5	PG4
808	2	43	2	2	5	PG4
809	1	5	2	2	4	PG5
810	2	4	2	1	4	PG5
811	2	62	2	1	4	PG4
812	2	51	1	1	4	PG4
813	2	26	1	1	4	PG4
814	2	37	1	1	4	PG4
815	2	37	1	1	4	PG4
816	1	50	1	2	4	PG4
817	1	4	2	2	1	PG5
818	2	16	2	1	1	PG5
819	2	74	2	1	1	PG5
820	2	22	1	1	1	PG5
821	1	69	1	1	1	PG5
822	2	14	1	1	1	PG5
823	1	49	2	2	7	PG6
824	2	18	1	1	7	PG6
825	2	61	2	2	2	PG6
826	1	40	2	2	2	PG6
827	2	55	2	1	6	PG5
828	2	6	2	1	6	PG5
829	2	23	2	1	6	PG6
830	2	55	1	2	5	PG6
831	1	31	2	2	4	PG4
832	1	34	2	1	4	PG4
833	1	30	2	2	2	PG4
834	1	38	2	2	2	PG4
835	1	30	2	1	1	PG4
836	2	26	2	2	7	PG5
837	1	30	1	2	7	PG6
838	1	11	1	2	7	PG6
839	1	29	1	2	3	PG5
840	2	48	2	2	3	PG5
841	2	33	1	2	4	PG5
842	1	39	2	1	4	PG5
843	1	43	2	1	4	PG5
844	1	45	2	1	1	PG6
845	2	16	2	2	6	PG6
846	2	35	2	2	6	PG6
847	2	7	1	1	6	PG6
848	1	58	1	2	6	PG6
849	1	72	1	1	6	PG6
850	1	38	2	1	6	PG6
851	1	26	2	2	6	PG6
852	1	26	1	1	6	PG6
853	1	38	2	1	7	PG5
854	1	28	2	2	7	PG5
855	1	39	2	1	5	PG5
856	1	79	1	1	5	PG5
857	2	27	1	2	5	PG5
858	2	40	2	1	4	PG6
859	1	31	2	2	4	PG6
860	1	44	2	1	4	PG6
861	1	32	2	2	3	PG4
862	2	5	2	2	3	PG4
863	1	48	2	2	3	PG6
864	1	31	2	2	3	PG5
865	1	77	2	2	3	PG5
866	2	8	2	2	3	PG4
867	2	29	1	1	3	PG4
868	1	68	1	1	3	PG4
869	2	24	1	1	3	PG4
870	1	36	2	2	3	PG5
871	2	25	1	2	3	PG6
872	1	39	1	1	3	PG6
873	1	48	1	1	3	PG6
874	1	4	1	1	3	PG6
875	1	53	2	1	1	PG5
876	2	59	2	2	3	PG5
877	1	25	2	1	1	PG5
878	2	25	2	1	1	PG5
879	1	22	2	1	4	PG4
880	1	5	1	2	4	PG4
881	1	36	1	1	4	PG4
882	1	36	2	2	2	PG5
883	1	32	1	1	2	PG5
884	2	28	2	1	1	PG5
885	1	50	2	1	6	PG5
886	1	16	2	1	6	PG5
887	1	34	2	2	5	PG4
888	1	9	1	1	5	PG4
889	2	12	1	1	5	PG4
890	1	29	1	1	1	PG5
891	1	31	1	1	1	PG5
892	1	51	2	2	2	PG6
893	1	42	2	2	2	PG6
894	2	24	2	1	6	PG6
895	2	35	2	2	6	PG6
896	1	6	1	1	6	PG6
897	2	34	1	1	6	PG6
898	2	33	1	1	6	PG6
899	1	33	1	1	6	PG6
900	2	47	1	1	6	PG6
901	1	29	1	1	6	PG6
902	2	35	1	1	4	PG5
903	1	18	1	1	4	PG5
904	2	50	1	1	1	PG4
905	2	40	1	1	1	PG4
906	1	52	1	2	1	PG4
907	1	34	1	1	1	PG4
908	1	8	1	1	2	PG6
909	2	26	2	2	4	PG4
910	1	6	1	1	4	PG4
911	2	57	1	1	4	PG4
912	2	34	1	1	4	PG4
913	2	8	1	1	4	PG4
914	1	53	2	1	5	PG5
915	2	4	2	1	5	PG5
916	1	7	1	1	5	PG5
917	1	39	2	2	1	PG6
918	1	39	2	1	1	PG6
919	1	7	1	2	1	PG6
920	1	7	1	1	1	PG6
921	1	34	1	1	1	PG6
922	1	25	1	1	6	PG5
923	2	4	2	1	5	PG4
924	1	85	2	1	5	PG4
925	2	33	1	1	5	PG4
926	1	34	1	1	2	PG5
927	1	17	2	2	2	PG4
928	2	25	2	1	2	PG4
929	1	34	2	2	3	PG5
930	2	36	2	2	3	PG4
931	1	24	2	2	3	PG6
932	2	22	1	1	3	PG4
933	2	28	1	1	3	PG4
934	1	37	1	1	3	PG4
935	2	22	1	1	3	PG4
936	1	21	1	2	3	PG4
937	1	29	1	1	3	PG4
938	2	57	2	2	3	PG4
939	1	32	2	1	1	PG6
940	2	26	2	1	1	PG6
941	2	36	2	1	1	PG6
942	1	37	2	1	1	PG6
943	1	31	1	2	1	PG6
944	2	52	1	1	6	PG6
945	2	26	2	2	3	PG4
946	1	6	2	2	3	PG6
947	1	30	1	1	3	PG6
948	2	23	1	2	6	PG5
949	2	29	1	1	6	PG5
950	2	7	2	1	4	PG5
951	2	41	1	2	4	PG5
952	1	33	1	1	4	PG5
953	2	31	1	2	4	PG5
954	1	38	1	1	4	PG5
955	2	27	1	1	4	PG5
956	2	23	2	2	3	PG5
957	1	41	2	2	3	PG5
958	1	26	2	2	4	PG4
959	2	33	2	1	6	PG5
960	2	29	2	2	1	PG4
961	2	22	2	2	7	PG5
962	1	29	1	1	1	PG6
963	1	20	1	2	1	PG5
964	1	15	2	2	4	PG4
965	2	30	2	2	6	PG6
966	1	30	1	2	6	PG6
967	1	37	2	1	1	PG4
968	2	25	2	2	4	PG4
969	2	55	2	2	2	PG5
970	2	34	1	1	2	PG5
971	1	23	2	2	1	PG5
972	2	57	2	1	5	PG6
973	1	37	2	2	3	PG6
974	1	54	1	2	3	PG6
975	2	53	1	1	5	PG6
976	2	4	1	1	5	PG6
977	1	25	1	1	5	PG6
978	1	8	1	1	5	PG6
979	2	21	1	1	7	PG6
980	1	6	1	2	7	PG6
981	1	62	1	2	7	PG6
982	1	7	1	1	7	PG6
983	1	3	1	2	7	PG6
984	2	26	1	2	7	PG6
985	1	35	1	1	7	PG6
986	1	36	2	2	6	PG5
987	2	27	2	1	6	PG5
988	1	50	1	1	6	PG5
